# Supplementary material for: A novel representation of RNA secondary structure based on element-contact graphs
Source: PubMed Central journal article supplement (PMC2373570; doi:10.1186/1471-2105-9-188), 2008-04-11

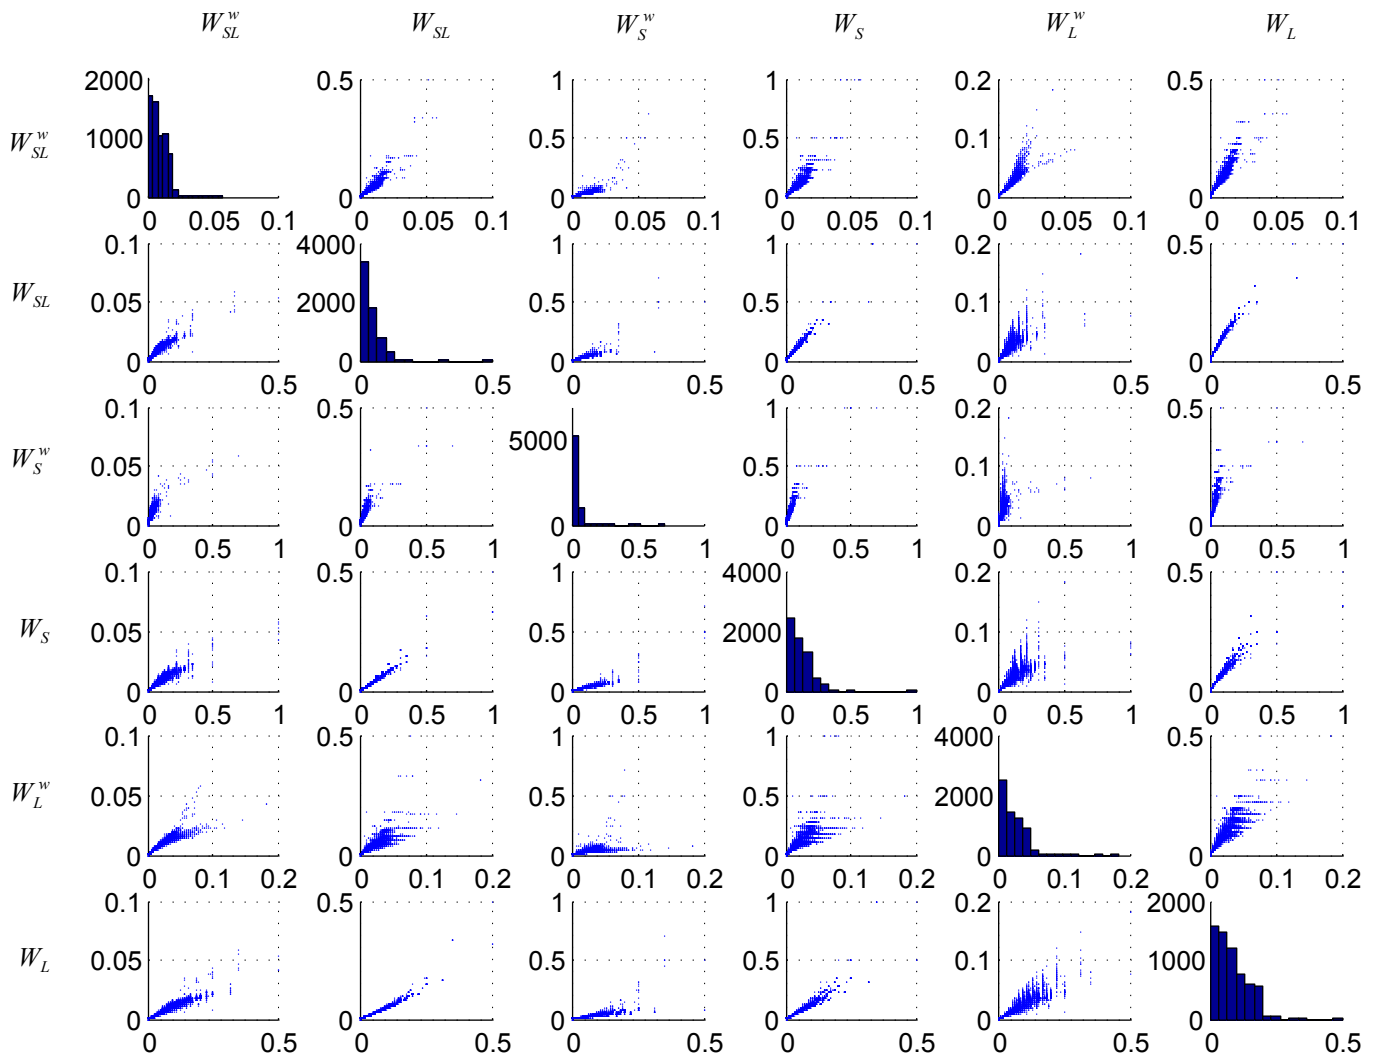

Supplement: 1471-2105-9-188-S13.pdf [file 1471-2105-9-188-S13.pdf]
